# Supplementary material for: Mapping the structure of depression biomarker research: A bibliometric analysis
Source: PubMed Central journal article supplement (PMC9523516; doi:10.3389/fpsyt.2022.943996), 2022-09-16
Supplement: Data_Sheet_1.pdf [file Data_Sheet_1.pdf]

## *Mapping the Structure of Depression Biomarker Research: A Bibliometric Analysis*

### 1 The Core Authors and Intellectual Basis of the Research Field

To identify scholars with a large influence in the field of depression biomarkers and to gain insight into the most influential or foundational knowledge in the field, we constructed an author co-citation collaboration network. In the co-citation network, the size of the nodes represents the frequency with which the author's work has been cited, and the thickness of the lines between nodes represents the number of co-citations of connected authors.

Since 2009, 72,374 authors have contributed to the research on biomarkers of depression. Of these authors, the top 10 have been involved in the publishing of a total of 1270 articles (8.82%). Maes M had the highest number of articles, with 89 (0.62%), and Penninx B.W.J.H. had the second-highest number of articles, with 88 (0.61%). Figure 4 shows the co-citation network, and Table 3 lists the top 10 cited authors. The results showed that Maes M ranked first with 2673 citations, Berk, M second with 2607, and Penninx ranked third with 2379 citations.

**Supplementary Table 1** The top 10 most procreative authors who contributed to publications and the top 10 co-cited authors and references in depression biomarker research

| Ran<br>k | Author          | Frequenc<br>y | Co-cited<br>Authors | Frequenc<br>y | Top 10 References               | Frequenc<br>y |
|----------|-----------------|---------------|---------------------|---------------|---------------------------------|---------------|
| 1        | Maes M          | 89            | Maes M              | 2673          | 10.1016/S0140-6736(12)62129-1   | 1840          |
| 2        | Penninx<br>BWJH | 88            | Berk M              | 2607          | 10.1001/2013.jamapsychiatry.4   | 927           |
| 3        | Wang<br>Y       | 80            | Penninx<br>BWJH     | 2379          | 10.1016/j.bbi.2015.03.016       | 861           |
| 4        | Berk M          | 70            | Zarate C            | 2274          | 10.1038/nm.4246                 | 816           |
| 5        | Zhang<br>Y      | 70            | Mayberg<br>H        | 2250          | 10.1001/archpediatrics.2009.214 | 702           |
| 6        | Teixeira<br>AL  | 67            | Miller A            | 2102          | 10.1056/NEJMoa1001593           | 698           |

|    |            |    |              |      |                                   |     |
|----|------------|----|--------------|------|-----------------------------------|-----|
| 7  | Li Y       | 60 | Kapczinski F | 1919 | 10.1016/j.marenvres.2012.04.003   | 623 |
| 8  | Kennedy SH | 49 | Irvin M      | 1884 | 10.1093/bioinformatics/btu848     | 589 |
| 9  | Liu Y      | 48 | Xie P        | 1821 | 10.1038/mp.2012.105               | 572 |
| 10 | Hickie IB  | 45 | Phillips M   | 1756 | 10.1016/j.landurbplan.2011.12.015 | 533 |

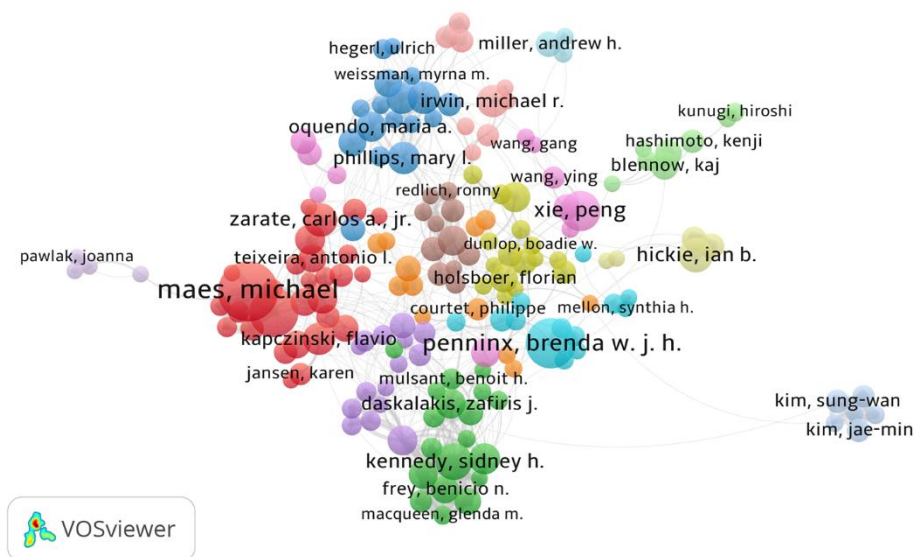

**Supplementary Figure 1** The visualization of co-citation network mapping of authors in depression biomarker research. The thickness of the lines indicates the strength of the relationship.

## 2 Clustering Analysis of Keywords and Co-word Analysis

Keywords serve as a comprehensive overview and distillation of a paper's content and subject matter. Keyword co-occurrence is commonly used to reveal research hotspots. Cluster and hotspot analyses of keywords based on VOSviewer were conducted to identify the main research directions and knowledge hotspots for depression biomarkers. The results are shown in Figure 5. The node size and colour indicate the number of keywords and clusters, respectively. The co-occurrence frequency between keywords is indicated by the thickness of the line between the nodes, and different clusters represent different research directions and hotspot areas. The closer the colour is to yellow in the hotspot density plot, the higher the frequency of keywords in that area, which reveals the research hotspots in this field.





CiteSpace, v. 5.8.R3 (64-bit)  
August 10, 2021 9:58:48 PM CST  
Workspace: C:\Users\Wuhuanzhen\Desktop\031010\15\jingshengbing\download  
Timespan: 2001-2021 (Slice Length=1)  
Selection Criteria: g-index (k=25), LRF=3.0, L/N=10, LBY=5, ee=1.0  
Network: N=910, E=3442 (Density=0.0063)  
Largest CC: 872 (73%)  
Nodes Labeled: 1.0%  
Pruning: None

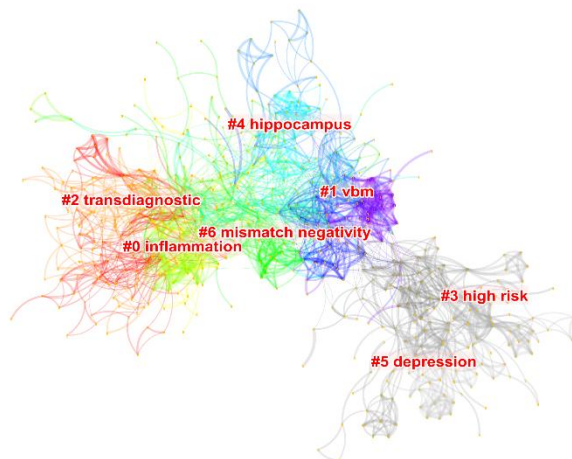

**Supplementary Figure 4** The visualization of reference co-citation analysis of psychosis biomarker research.
